# Supplementary material for: Characterization of Glycoside Hydrolase Families 13 and 31 Reveals Expansion and Diversification of α-Amylase Genes in the Phlebotomine Lutzomyia longipalpis and Modulation of Sandfly Glycosidase Activities by Leishmania Infection
Source: Front Physiol. 2021 Apr 9;12:635633. doi: 10.3389/fphys.2021.635633 (PMC8063059; doi:10.3389/fphys.2021.635633)
Supplement: Supplementary Table 1 — Identifiers and accession numbers of insect GH13 protein sequences used for the phylogenetic tree of Figure 2. [file Table_1.xlsx]

## Sheet: Sheet1
Table 1. Identifiers and accession numbers of insect GH13 protein sequences used for the phylogenetic tree of Figure 2. NBAT -Neutral and basic amino acid transport protein. a - Salivary proteins. b - Toxin receptors.
Specie	Vector base/ Fly base acession numbers	This Work	Current Status	Tree Code Identifier
Lutzomyia longipalpis	LLOJ004838_1	Alpha-Amylase	Alpha-Amylase	LlAamyA1
Lutzomyia longipalpis	LLOJ004838_2	Alpha-Amylase	Alpha-Amylase	LlAamyA2
Lutzomyia longipalpis	LLOJ004839	Alpha-Amylase	Alpha-Amylase	LlAamyA3
Lutzomyia longipalpis	LLOJ004841	Alpha-Amylase	Alpha-Amylase	LlAamyA4
Lutzomyia longipalpis	LLOJ004880_1	Alpha-Amylase	Alpha-Amylase	LlAamyB1
Lutzomyia longipalpis	LLOJ004880_2	Alpha-Amylase	Alpha-Amylase	LlAamyB2
Lutzomyia longipalpis	LLOJ004880_3	Alpha-Amylase	Alpha-Amylase	LlAamyB3
Lutzomyia longipalpis	LLOJ004881_1	Alpha-Amylase	Alpha-Amylase	LlAamyB4
Lutzomyia longipalpis	LLOJ004881_2	Alpha-Amylase	Alpha-Amylase	LlAamyB5
Lutzomyia longipalpis	LLOJ004881_3	Alpha-Amylase	Alpha-Amylase	LlAamyB6
Lutzomyia longipalpis	LLOJ004882	Alpha-Amylase	Alpha-Amylase	LlAamyB7
Lutzomyia longipalpis	LLOJ004885	Alpha-Amylase	Not Especified	LlAamyB8
Lutzomyia longipalpis	LLOJ005909_1	Alpha-Amylase	Alpha-Amylase	LlAamyC1
Lutzomyia longipalpis	LLOJ005909_2	Alpha-Amylase	Alpha-Amylase	LlAamyC2
Lutzomyia longipalpis	LLOJ000566	Alpha-glucosidase	Not Especified	LlAglu1
Lutzomyia longipalpis	LLOJ008156	Alpha-glucosidase	Not Especified	LlAglu2
Lutzomyia longipalpis	LLOJ002257	Alpha-glucosidase	Not Especified	LlAglu3
Lutzomyia longipalpis	LLOJ008629	NBAT protein	Not Especified	LlNBAThc
Lutzomyia longipalpis	LLOJ006803	CD98 heavy chain	Not Especified	LlCD98hc
Lutzomyia longipalpis	LLOJ005533	1,4-alpha-glucan-branching enzyme	Not Especified	LlAGB1
Lutzomyia longipalpis	LLOJ008312	Glycogen debranching enzyme	Not Especified	LlGDE1
Phlebotomus papatasi	PPAI010148	Alpha-Amylase	Alpha-Amylase	PpAamy1
Phlebotomus papatasi	PPAI010150_1	Alpha-Amylase	Alpha-Amylase	PpAamy2
Phlebotomus papatasi	PPAI010150_2	Alpha-Amylase	Alpha-Amylase	PpAamy3
Phlebotomus papatasi	PPAI010150_3	Alpha-Amylase	Alpha-Amylase	PpAamy4
Phlebotomus papatasi	PPAI010150_4	Alpha-Amylase	Alpha-Amylase	PpAamy5
Phlebotomus papatasi	PPAI010151_1	Alpha-Amylase	Alpha-Amylase	PpAamy6
Phlebotomus papatasi	PPAI010151_2	Alpha-Amylase	Alpha-Amylase	PpAamy7
Phlebotomus papatasi	PPAI010151_3	Alpha-Amylase	Alpha-Amylase	PpAamy8
Phlebotomus papatasi	PPAI010255	Alpha-glucosidase	Not Especified	PpAgluA1
Phlebotomus papatasi	PPAI010256	Alpha-glucosidase	Not Especified	PpAgluA2
Phlebotomus papatasi	PPAI010257	Alpha-glucosidase	Not Especified	PpAgluA3
Phlebotomus papatasi	PPAI010258	Alpha-glucosidase	Not Especified	PpAgluA4
Phlebotomus papatasi	PPAI010759	Alpha-glucosidase	Not Especified	PpAgluB1
Phlebotomus papatasi	PPAI010760_1	Alpha-glucosidase	Not Especified	PpAgluB2
Phlebotomus papatasi	PPAI010760_2	Alpha-glucosidase	Not Especified	PpAgluB3
Phlebotomus papatasi	PPAI010760_3	Alpha-glucosidase	Not Especified	PpAgluB4
Phlebotomus papatasi	PPAI010760_4	Alpha-glucosidase	Not Especified	PpAgluB5
Phlebotomus papatasi	PPAI001789	NBAT protein	Not Especified	PpNBAThc
Phlebotomus papatasi	PPAI004854	CD98 heavy chain	Not Especified	PpCD98hc
Phlebotomus papatasi	PPAI008963	1,4-alpha-glucan-branching enzyme	Alpha-Amylase	PpAGB1
Phlebotomus papatasi	PPAI009397	Glycogen debranching enzyme	Not Especified	PpGDE1
Aedes Aegypti	AAEL006719-PA	Alpha-Amylase	Alpha-Amylase (Amy1)	AaAamy1
Aedes Aegypti	AAEL001130-PA	Alpha-Amylase	Alpha-Amylase	AaAamy2
Aedes Aegypti	AAEL007673-PA	Alpha-Amylase	Alpha-Amylase	AaAamy3
Aedes Aegypti	AAEL008451-PA	Alpha-Amylase	Alpha-Amylase	AaAamy4
Aedes Aegypti	AAEL008452-PA	Alpha-Amylase	Alpha-Amylase	AaAamy5
Aedes Aegypti	AAEL008456-PA	Alpha-Amylase	Alpha-Amylase	AaAamy6
Aedes Aegypti	AAEL013421-PA	Alpha-Amylase	Alpha-Amylase	AaAamy7
Aedes Aegypti	AAEL026011-PA	Alpha-Amylase	Not Especified	AaAamy8
Aedes Aegypti	AAEL026503-PA	Alpha-Amylase	Not Especified	AaAamy9
Aedes Aegypti	AAEL009524-PA	Alpha-glucosidase	Alpha-Glycosidase (Mal1)a	AaMal1
Aedes Aegypti	AAEL000647-PA	Alpha-glucosidase	Alpha-Amylase	AaAglu2
Aedes Aegypti	AAEL000651-PA	Alpha-glucosidase	Alpha-Amylase	AaAglu3
Aedes Aegypti	AAEL000667-PB	Alpha-glucosidase	Alpha-Amylase	AaAglu4
Aedes Aegypti	AAEL000678-PA	Alpha-glucosidase	Alpha-Amylase	AaAglu5
Aedes Aegypti	AAEL003434-PA	Alpha-glucosidase	Alpha-Amylase	AaAglu6
Aedes Aegypti	AAEL000642-PA	Alpha-glucosidase	Alpha-Amylase	AaAglu7
Aedes Aegypti	AAEL010532-PA	Alpha-glucosidase	Alpha-Amylase	AaAglu8
Aedes Aegypti	AAEL010536-PB	Alpha-glucosidase	Alpha-Amylase	AaAglu9B
Aedes Aegypti	AAEL010536-PC	Alpha-glucosidase	Alpha-Amylase	AaAglu9C
Aedes Aegypti	AAEL010536-PD	Alpha-glucosidase	Alpha-Amylase	AaAglu9D
Aedes Aegypti	AAEL010540-PA	Alpha-glucosidase	Alpha-Amylase	AaAglu10
Aedes Aegypti	AAEL017128-PB	Alpha-glucosidase	Not Especified	AaAglu11
Aedes Aegypti	AAEL010537-PA	Alpha-glucosidase	Maltaseb	AaAglu12
Aedes Aegypti	AAEL008502-PA	NBAT protein	Not Especified	AaNBAThc
Aedes Aegypti	AAEL002527-PA	CD98 heavy chain	Not Especified	AaCD98hc1A
Aedes Aegypti	AAEL002527-PB	CD98 heavy chain	Not Especified	AaCD98hc1B
Aedes Aegypti	AAEL010602-PA	1,4-alpha-glucan-branching enzyme	Starch branching enzyme	AaAGB1
Aedes Aegypti	AAEL009838-PA	Glycogen debranching enzyme	Glycogen debranching enzyme	AaGDE1A
Aedes Aegypti	AAEL009838-PB	Glycogen debranching enzyme	Glycogen debranching enzyme	AaGDE1B
Anopheles gambiae	AGAP002317-PA	Alpha-Amylase	Alpha-Amylase	AgAamy1
Anopheles gambiae	AGAP002318-PA	Alpha-Amylase	Alpha-Amylase	AgAamy2
Anopheles gambiae	AGAP006371-PA	Alpha-Amylase	Alpha-Amylase (Amyrel)a	AgAamy3
Anopheles gambiae	AGAP012230-PA	Alpha-Amylase	Alpha-Amylase (Amyrel)	AgAamy4
Anopheles gambiae	AGAP008961-PA	Alpha-glucosidase	Maltaseb	AgMal1
Anopheles gambiae	AGAP008962-PA	Alpha-glucosidase	Alpha-glucosidase	AgAglu2
Anopheles gambiae	AGAP008963-PA	Alpha-glucosidase	Not Especified	AgAglu3
Anopheles gambiae	AGAP012400-PA	Alpha-glucosidase	Alpha-glucosidase	AgAglu4
Anopheles gambiae	AGAP012401-PA	Alpha-glucosidase	Maltase (AGM1)	AgAglu5
Anopheles gambiae	AGAP006019-PA	Alpha-glucosidase	Maltase	AgAglu6
Anopheles gambiae	AGAP008964-PA	Alpha-glucosidase	Maltase	AgAglu7
Anopheles gambiae	AGAP008965-PA	Alpha-glucosidase	Maltase	AgAglu8
Anopheles gambiae	AGAP011939-PA	Alpha-glucosidase	Not Especified	AgAglu9
Anopheles gambiae	AGAP012399-PA	Alpha-glucosidase	Maltase	AgAglu10
Anopheles gambiae	AGAP002102-PA	Alpha-glucosidase	Alpha-glucosidasea	AgAglu11
Anopheles gambiae	AGAP009127-PA	NBAT protein	Not Especified	AgNBAThc
Anopheles gambiae	AGAP000022-PA	CD98 heavy chain	Not Especified	AgCD98hc
Anopheles gambiae	AGAP010428-PA	1,4-alpha-glucan-branching enzyme	1,4-alpha-glucan-branching enzyme	AgAGB1
Anopheles gambiae	AGAP001200-PA	Glycogen debranching enzyme	Glycogen debranching enzyme	AgGDE1A
Anopheles gambiae	AGAP001200-PB	Glycogen debranching enzyme	Glycogen debranching enzyme	AgGDE1B
Culex quinquefasciatus	CPIJ008079-PA	Alpha-Amylase	Alpha-Amylase 1	CqAamy1
Culex quinquefasciatus	CPIJ005060-PA	Alpha-Amylase	Alpha-Amylase B	CqAamy2
Culex quinquefasciatus	CPIJ005061-PA	Alpha-Amylase	Alpha-Amylase B	CqAamy3
Culex quinquefasciatus	CPIJ005062-PA	Alpha-Amylase	Alpha-Amylase	CqAamy4
Culex quinquefasciatus	CPIJ005064-PA	Alpha-Amylase	Alpha-Amylase	CqAamy5
Culex quinquefasciatus	CPIJ005065-PA	Alpha-Amylase	Alpha-Amylase 2	CqAamy6
Culex quinquefasciatus	CPIJ005700-PA	Alpha-Amylase	Alpha-Amylase B	CqAamy7
Culex quinquefasciatus	CPIJ005725-PA	Alpha-Amylase	Alpha-Amylase A	CqAamy8
Culex quinquefasciatus	CPIJ007333-PA	Alpha-Amylase	Amylase	CqAamy9
Culex quinquefasciatus	CPIJ001464-PA	Alpha-Amylase	Alpha-Amylase A	CqAamy10
Culex quinquefasciatus	CPIJ017521-PA	Alpha-Amylase	Alpha-Amylase I	CqAamy11
Culex quinquefasciatus	CPIJ018222-PA	Alpha-Amylase	Alpha-Amylase B	CqAamy12
Culex quinquefasciatus	CPIJ013173-PA	Alpha-glucosidase	NBAT proteinb	CqMal1
Culex quinquefasciatus	CPIJ013170-PA	Alpha-glucosidase	Maltase 2	CqAglu2
Culex quinquefasciatus	CPIJ005213-PA	Alpha-glucosidase	Alpha-glucosidase	CqAglu3
Culex quinquefasciatus	CPIJ010128-PA	Alpha-glucosidase	Alpha-glucosidase	CqAglu4
Culex quinquefasciatus	CPIJ012204-PA	Alpha-glucosidase	Alpha-glucosidase	CqAglu5
Culex quinquefasciatus	CPIJ013169-PA	Alpha-glucosidase	Alpha-glucosidase	CqAglu6
Culex quinquefasciatus	CPIJ013171-PA	Alpha-glucosidase	Alpha-glucosidase	CqAglu7
Culex quinquefasciatus	CPIJ013172-PA	Alpha-glucosidase	Alpha-glucosidase	CqAglu8
Culex quinquefasciatus	CPIJ016362-PA	Alpha-glucosidase	Alpha-glucosidasea	CqAglu9
Culex quinquefasciatus	CPIJ019691-PA	Alpha-glucosidase	Alpha-glucosidase	CqAglu10
Culex quinquefasciatus	CPIJ019693-PA	Alpha-glucosidase	Alpha-glucosidase	CqAglu11
Culex quinquefasciatus	CPIJ019692-PA	Alpha-glucosidase	Alpha-amylase	CqAglu12
Culex quinquefasciatus	CPIJ005208-PA	Alpha-glucosidase	Alpha-Amylase	CqAglu13
Culex quinquefasciatus	CPIJ005210-PA	Alpha-glucosidase	Alpha-Amylase	CqAglu14
Culex quinquefasciatus	CPIJ018570-PA	Alpha-glucosidase	Alpha-Amylase	CqAglu15
Culex quinquefasciatus	CPIJ005212-PA	Oligo-1,6-glucosidase	Oligo-1,6-glucosidase	CqOliglu1
Culex quinquefasciatus	CPIJ019689-PA	Cyclomaltodextrin glucanotransferase	Cyclomaltodextrin glucanotransferase	CqCMalglut1
Culex quinquefasciatus	CPIJ019690-PA	Maltodextrin glucosidase	Maltodextrin glucosidase	CqMalglu1
Culex quinquefasciatus	CPIJ005211-PA	Maltodextrin glucosidase	Alpha-Amylase 2	CqMalglu2
Culex quinquefasciatus	CPIJ000760-PA	NBAT protein	Not Especified	CqNBAThc
Culex quinquefasciatus	CPIJ011854-PA	CD98 heavy chain	CD98hc amino acid transporter protein	CqCD98hc
Culex quinquefasciatus	CPIJ006166-PA	1,4-alpha-glucan-branching enzyme	Deltamethrin resistance-associated NYD-GBE	CqAGB1
Culex quinquefasciatus	CPIJ013040-PA	Glycogen debranching enzyme	Glycogen debranching enzyme	CqGDE1
Culex quinquefasciatus	CPIJ020026-PA	Glycogen debranching enzyme	Glycogen debranching enzyme	CqGDE2
Drosophila melanogaster	FBpp0086263	Alpha-Amylase	Amyrel-PA	DmAmyrel
Drosophila melanogaster	FBpp0086136	Alpha-Amylase	Amy-d-PA	DmAmyd
Drosophila melanogaster	FBpp0086155	Alpha-Amylase	Amy-p-PA	DmAmypA
Drosophila melanogaster	FBpp0311627	Alpha-Amylase	Amy-p-PB	DmAmypB
Drosophila melanogaster	FBpp0087838	Maltase	Mal-A1-PA	DmMal1
Drosophila melanogaster	FBpp0087826	Maltase	Mal-A2-PA	DmMal2
Drosophila melanogaster	FBpp0087837	Maltase	Mal-A3-PA	DmMal3
Drosophila melanogaster	FBpp0087827	Maltase	Mal-A4-PA	DmMal4
Drosophila melanogaster	FBpp0087828	Maltase	Mal-A5-PA	DmMal5A
Drosophila melanogaster	FBpp0290175	Maltase	Mal-A5-PB	DmMal5B
Drosophila melanogaster	FBpp0308388	Maltase	Mal-A5-PC	DmMal5C
Drosophila melanogaster	FBpp0271830	Maltase	Mal-A6-PC	DmMal6C
Drosophila melanogaster	FBpp0312227	Maltase	Mal-A6-PD	DmMal6D
Drosophila melanogaster	FBpp0087836	Maltase	Mal-A7-PA	DmMal7A
Drosophila melanogaster	FBpp0311600	Maltase	Mal-A7-PB	DmMal7B
Drosophila melanogaster	FBpp0087831	Maltase	Mal-A8-PA	DmMal8
Drosophila melanogaster	FBpp0079859	Maltase	Mal-B1-PAa	DmMalB1
Drosophila melanogaster	FBpp0079860	Maltase	Mal-B2-PA	DmMalB2A
Drosophila melanogaster	FBpp0292312	Maltase	Mal-B2-PC	DmMalB2C
Drosophila melanogaster	FBpp0292313	Maltase	Mal-B2-PD	DmMalB2D
Drosophila melanogaster	FBpp0081314	CD98 heavy chain	CD98 heavy chain, isoform A	DmCD98hc1A
Drosophila melanogaster	FBpp0303760	CD98 heavy chain	CD98 heavy chain, isoform B	DmCD98hc1B
Drosophila melanogaster	FBpp0303762	CD98 heavy chain	CD98 heavy chain, isoform D	DmCD98hc1D
Drosophila melanogaster	FBpp0304466	CD98 heavy chain	CD98 heavy chain, isoform F	DmCD98hc1F
Drosophila melanogaster	FBpp0086845	1,4-alpha-glucan-branching enzyme	AGBE-PA	DmAGB1
Drosophila melanogaster	FBpp0071525	Glycogen debranching enzyme	CG9485-PA	DmGDE1A
Drosophila melanogaster	FBpp0071526	Glycogen debranching enzyme	CG9485-PB	DmGDE1B
Drosophila melanogaster	FBpp0071527	Glycogen debranching enzyme	CG9485-PC	DmGDE1C
Drosophila melanogaster	FBpp0289623	Glycogen debranching enzyme	CG9485-PD	DmGDE1D
Drosophila melanogaster	FBpp0289624	Glycogen debranching enzyme	CG9485-PE	DmGDE1E
Drosophila melanogaster	FBpp0302010	Glycogen debranching enzyme	CG9485-PF	DmGDE1F
Drosophila ananassae	FBpp0115773	Alpha-Amylase	Dana\Amyc1-PA	DaAamy1
Drosophila ananassae	FBpp0116650	Alpha-Amylase	Dana\Amyc6-PA	DaAamy2
Drosophila ananassae	FBpp0122036	Alpha-Amylase	Dana\Amy35-PA	DaAamy3
Drosophila ananassae	FBpp0122035	Alpha-Amylase	Dana\Amy58-PA	DaAamy4
Drosophila ananassae	FBpp0344793	Alpha-Amylase	Dana\GF27675-PA	DaAmy5
Drosophila ananassae	FBpp0115779	Maltase	Dana\Mal-A1-PA	DaMalA1
Drosophila ananassae	FBpp0115552	Maltase	Dana\Mal-A2-PA	DaMalA2
Drosophila ananassae	FBpp0115778	Maltase	Dana\Mal-A3-PA	DaMalA3
Drosophila ananassae	FBpp0115553	Maltase	Dana\Mal-A4-PA	DaMalA4
Drosophila ananassae	FBpp0115554	Maltase	Dana\Mal-A5-PA	DaMalA5
Drosophila ananassae	FBpp0115555	Maltase	Dana\Mal-A6-PA	DaMalA6
Drosophila ananassae	FBpp0115777	Maltase	Dana\Mal-A7-PA	DaMalA7
Drosophila ananassae	FBpp0115556	Maltase	Dana\Mal-A8-PA	DaMalA8
Drosophila ananassae	FBpp0124798	Maltase	Dana\Mal-B1-PA	DaMalB1
Drosophila ananassae	FBpp0124799	Maltase	Dana\Mal-B2-PA	DaMAlB2A
Drosophila ananassae	FBpp0344084	Maltase	Dana\Mal-B2-PB	DaMAlB2B
Drosophila ananassae	FBpp0349800	Maltase	Dana\Mal-B2-PC	DaMAlB2C
Drosophila ananassae	FBpp0342698	CD98 heavy chain	Dana\GF16561-PB	DaCD98hc1B
Drosophila ananassae	FBpp0342739	CD98 heavy chain	Dana\GF16561-PC	DaCD98hc1C
Drosophila ananassae	FBpp0115136	1,4-alpha-glucan-branching enzyme	Dana\GF11944-PA	DaAGB1
Drosophila ananassae	FBpp0116003	Glycogen debranching enzyme	Dana\GF12811-PA	DaGDE1A
Drosophila ananassae	FBpp0346541	Glycogen debranching enzyme	Dana\GF12811-PB	DaGDE1B
Drosophila ananassae	FBpp0351281	Glycogen debranching enzyme	Dana\GF12811-PC	DaGDE1C
