# Supplementary material for: Characterization of Glycoside Hydrolase Families 13 and 31 Reveals Expansion and Diversification of α-Amylase Genes in the Phlebotomine Lutzomyia longipalpis and Modulation of Sandfly Glycosidase Activities by Leishmania Infection
Source: Front Physiol. 2021 Apr 9;12:635633. doi: 10.3389/fphys.2021.635633 (PMC8063059; doi:10.3389/fphys.2021.635633)
Supplement: Supplementary Table 4 — Modifications on sequences from GH13 and GH31 retrieved from vector base. [file Table_4.xlsx]

## Sheet: Sheet1 (2)
Table 4. Modifications on sequences from GH13 and GH31 retrieved from vector base.
GH Family	Vector base acession numbers	Acession numbers This work	Classification This Work	Identifier	Modifications
GH13	LLOJ004838	LLOJ004838_1	Alpha-Amylase	LlAamyA1	According to sequence alignment and RNA seq data avaiable on vector base, gene LLOJ004838 codifies for two proteins. Protein 1 (LlAamyA1) is codified by exon 1, 2, and 3. Extension of 5' region of exon 3 to match stop codon (addition 3 pb). Protein 2 (LlAamyA2) is codified by exon 6, 7, and 8. Extension of 3' region of exon 6 to match initial methionine (addition 36 pb). Exons 4 and 5 were exclud…
	LLOJ004838	LLOJ004838_2	Alpha-Amylase	LlAamyA2
	LLOJ004839	LLOJ004839	Alpha-Amylase	LlAamyA3	Extension of 3' region of exon 1 (additon 57 pb).
	LLOJ004841	LLOJ004841	Alpha-Amylase	LlAamyA4	Complete, no modification.
	LLOJ004880	LLOJ004880_1	Alpha-Amylase	LlAamyB1	According to sequence alignment and RNA seq data avaiable on vector base, gene LLOJ004880 codifies for three proteins. Protein 1 (LlAamyB1) is codified by exon 1, 2, and 3. Extension of 5' region of exon 3 to match stop codon (addition 63 pb). Protein 2 (LlAamyB2) is codified by exon 4, 5, and 6. Extension of 3' region of exon 4 to match initial methionine (addition 162 pb) and extension of 5' re…
	LLOJ004880	LLOJ004880_2	Alpha-Amylase	LlAamyB2
	LLOJ004880	LLOJ004880_3	Alpha-Amylase	LlAamyB3
	LLOJ004881	LLOJ004881_1	Alpha-Amylase	LlAamyB4	According to sequence alignment and RNA seq data avaiable on vector base, gene LLOJ004881 codifies for three proteins. Protein 1 (LlAamyB4) is codified by exon 1, 2, and 3. Extension of 3' region of exon 3 to match stop codon (addition 63 pb). Protein 2 (LlAamyB5) is codified by exon 4, 5, 6, and 7. Extension of 5' region of exon 4 to match initial methionine (addition 9 pb) and extension of 5' r…
	LLOJ004881	LLOJ004881_2	Alpha-Amylase	LlAamyB5
	LLOJ004881	LLOJ004881_3	Alpha-Amylase	LlAamyB6
	LLOJ004882	LLOJ004882	Alpha-Amylase	LlAamyB7	Not modified. Exon 2 is incomplete on 5' end, poor sequencing region.
	LLOJ004885	LLOJ004885	Alpha-Amylase	LlAamyB8	Not modified. Missing protein end, poor sequencing region
	LLOJ005909	LLOJ005909_1	Alpha-Amylase	LlAamyC1	According to sequence alignment and RNA seq data avaiable on vector base, gene LLOJ005909 codifies for two proteins. Protein 1 (LlAamyC1) is codified by exon 1 and 2. Extension of 3' region of exon 1 (addition 15 pb) and extension of 3' region of exon 2 to match stop codon (addition 42 pb). Protein 2 (LlAamyC2) is codified by exon 3,4, 5, and 6. Extension of 5' region of exon 3 to match initial m…
	LLOJ005909	LLOJ005909_2	Alpha-Amylase	LlAamyC2
	LLOJ000566	LLOJ000566	Alpha-glucosidase	LlAglu1	Extension of 3' region of exon 1 to match initial methionine (addition 35 pb), deletion of 24 pb in 5' region of exon 1. Extension of 5 ' region of exon 3 to match stop codon (addition 429 pb). Incomplete, missing beginning of protein, poor region sequence, end of the scaffold.
	LLOJ008156	LLOJ008156	Alpha-glucosidase	LlAglu2	Complete, no modification
	LLOJ002257	LLOJ002257	Alpha-glucosidase	LlAglu3	Deletion of nucleotide positioned at 36456, extension of 3' region of exon 1 (addition 630 pb).
	LLOJ008629	LLOJ008629	NBAT protein	LlNBAThc	Complete, no modification
	LLOJ006803	LLOJ006803	CD98 heavy chain	LlCD98hc	Initial exons were deleted, protein codified by exons 6, 7, and 8.
	LLOJ005533	LLOJ005533	1,4-alpha-glucan-branching enzyme	LlAGB1	Protein codified by exons 1, 2, 3, 4, and 5. Extension of 3' region of exon 5 to match stop codon (addition 75 pb). Exons 6 to 11 were deleted.
	LLOJ008312	LLOJ008312	Glycogen debranching enzyme	LlGDE1	According to sequence alignment and RNA seq data avaiable on vector base, gene LLOJ005533 codifies for two proteins. Protein 1 (LlGlyD1) is codified by exon 1 to 12. Exon 1 was changed in position, moved to position 227414 to 227572 (165 pb) frame +2. Extension of 3' region of exon 12 to match stop codon (addition 12 pb). Protein 2 is a sodium-coupled neutral amino acid transporter codified by ex…
GH31	LLOJ001847	LLOJ001847_1	Glycosidase NET37	LlGlyMyo1	According to sequence alignment and RNA seq data avaiable on vector base, gene LLOJ001847 codifies for two proteins. Protein 1 (LlGlyMyo1) is codified by exon 1, 2, and 3. Deletion nucleotide positioned 16455 and extension of 5' region of exon 1 (addition 285 pb). Extension of 5' region of exon 3 to match stop codon (addition 36 pb). Protein 2 (LlGlyMyo2) codified by exon 4 to 7. Extension of 3' …
	LLOJ001847	LLOJ001847_2	Glycosidase NET37	LlGlyMyo2
	LLOJ001881	LLOJ001881	Glycosidase NET37	LlGlyMyo3	Extension of 3' region of exon 1 (addition 174 pb). Incomplete.
	LLOJ000840	LLOJ000840	Glycosidase NET37	LlGlyMyo4	Extension of 5' region of exon 1 to match initial methionine (addition 141 pb).
	LLOJ006451	LLOJ006451	Lysosomal alpha-glucosidase	LlLysAglu1	Extension of 3' region of exon 1 (addition 27 pb). Extension of 5' region on exon 6 to match stop codon (addition 132 pb). Exon 7 was deleted. Incomplete, missing beginning of protein, poor region sequence, end of the scaffold.
	LLOJ003489	LLOJ003489	Neutral alpha-glucosidase	LlNAglu1	Complete, no modification
